# Supplementary material
Source: PubMed Central journal article supplement (PMC7056558)
Supplement: NIHMS1544180-supplement-1.pdf [file NIHMS1544180-supplement-1.pdf]

**Figure S1. Hsf1 loss significantly reduced human T-ALL cell survival.**

**(A-B)** Representative Western blots showing HSF1 protein expression in human T-ALL cell lines (CCL119 and CUTLL1) following silencing of Hsf1 by doxycycline-inducible shRNA expression for the indicated times. Cells expressing scramble shRNA were used as control (n=3 experiments).  $\alpha$ -tubulin was used as loading control.

**(C-D)** Cell-growth kinetics of CCL119 and CUTLL1 cell lines following silencing of Hsf1 as described in panels A and B. Cell growth assays were performed by plating  $2 \times 10^5$  cells in triplicate in 6-well plates in media containing doxycycline for the indicated times (n=4 independent analyses).

**(E-F)** Apoptosis or necrosis monitored by flow cytometric analysis (FACS) of T-ALL cells (CCL119 and CUTLL1) treated as described in panels A and B, and stained for annexin V and 7-AAD. The percent of apoptotic (annexinV<sup>pos</sup>-7AAD<sup>neg/pos</sup>) and necrotic (annexinV<sup>neg</sup>-7-AAD<sup>pos</sup>) cells is indicated in the quadrants. Quantification of apoptotic and necrotic cells is presented in the right panels (n=4 independent analyses).

For all panels, scale bars represent mean  $\pm$  SD. Statistical significance is indicated (\*  $p < 0.05$ , \*\*  $p < 0.01$ , \*\*\*  $p < 0.001$ ).

**Figure S2. Pharmacological inhibitors of the HSF1 pathway exhibit potent anti-tumor activity in human T-ALL cell lines.**

Human T-ALL (CCL119, CUTLL1, MOLT4, and CCRF-HSB2) cells were treated with increasing concentrations of the indicated HSF1 inhibitors (KRIB11 or Recoglamide), and cell viability/growth was recorded at 1 to 4 days. Drugs were replenished every 48 hours. Bars are means  $\pm$  SD (n=4 assays per group).

**Figure S3. HSF1 knockdown in human T-ALL cell lines reduces the mitochondrial membrane potential and increases cellular ROS levels.** T-ALL cell lines (CCL119 and CUTLL1) following silencing of Hsf1 by doxycycline-inducible shRNA expression for 3 days were analyzed. T-ALL cells (CCL119 and CUTLL1) expressing scramble shRNA were used as control. Cells were assayed for **(A)** Mitochondrial membrane potential and **(B)** cellular ROS activity by FACS analysis. For all panels, FACS profile or bars represent cells expressing Hsf1 shRNA (open) or scramble shRNA (filled). Scale bars represent mean  $\pm$  SD. (n=4 samples). Statistical significance is indicated (\*  $p < 0.05$ , \*\*  $p < 0.01$ ).

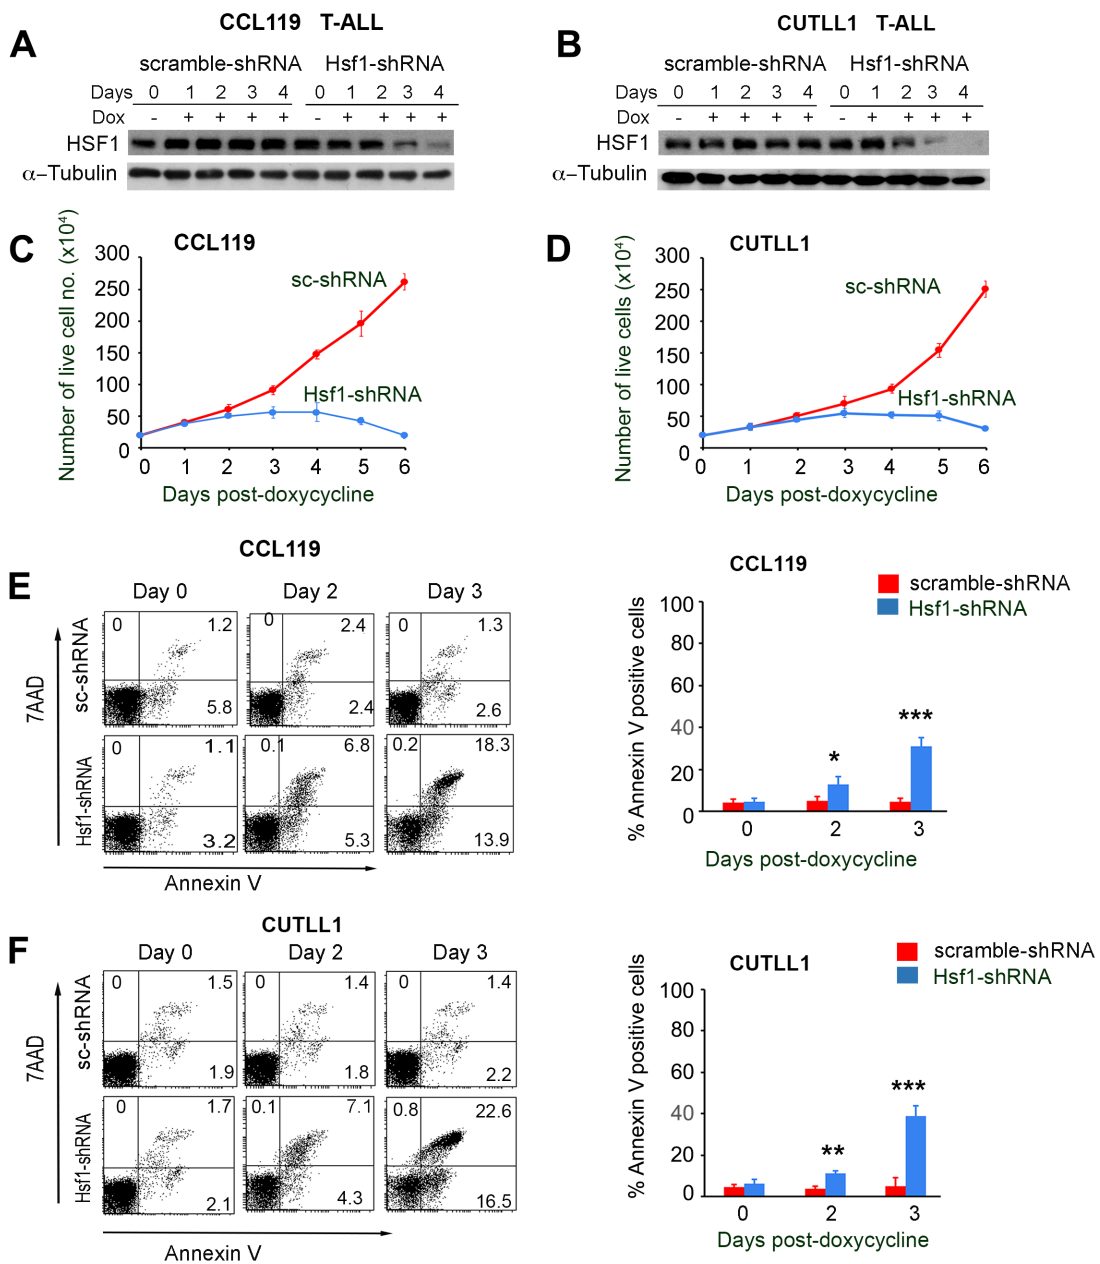

Fig. S1 A-F

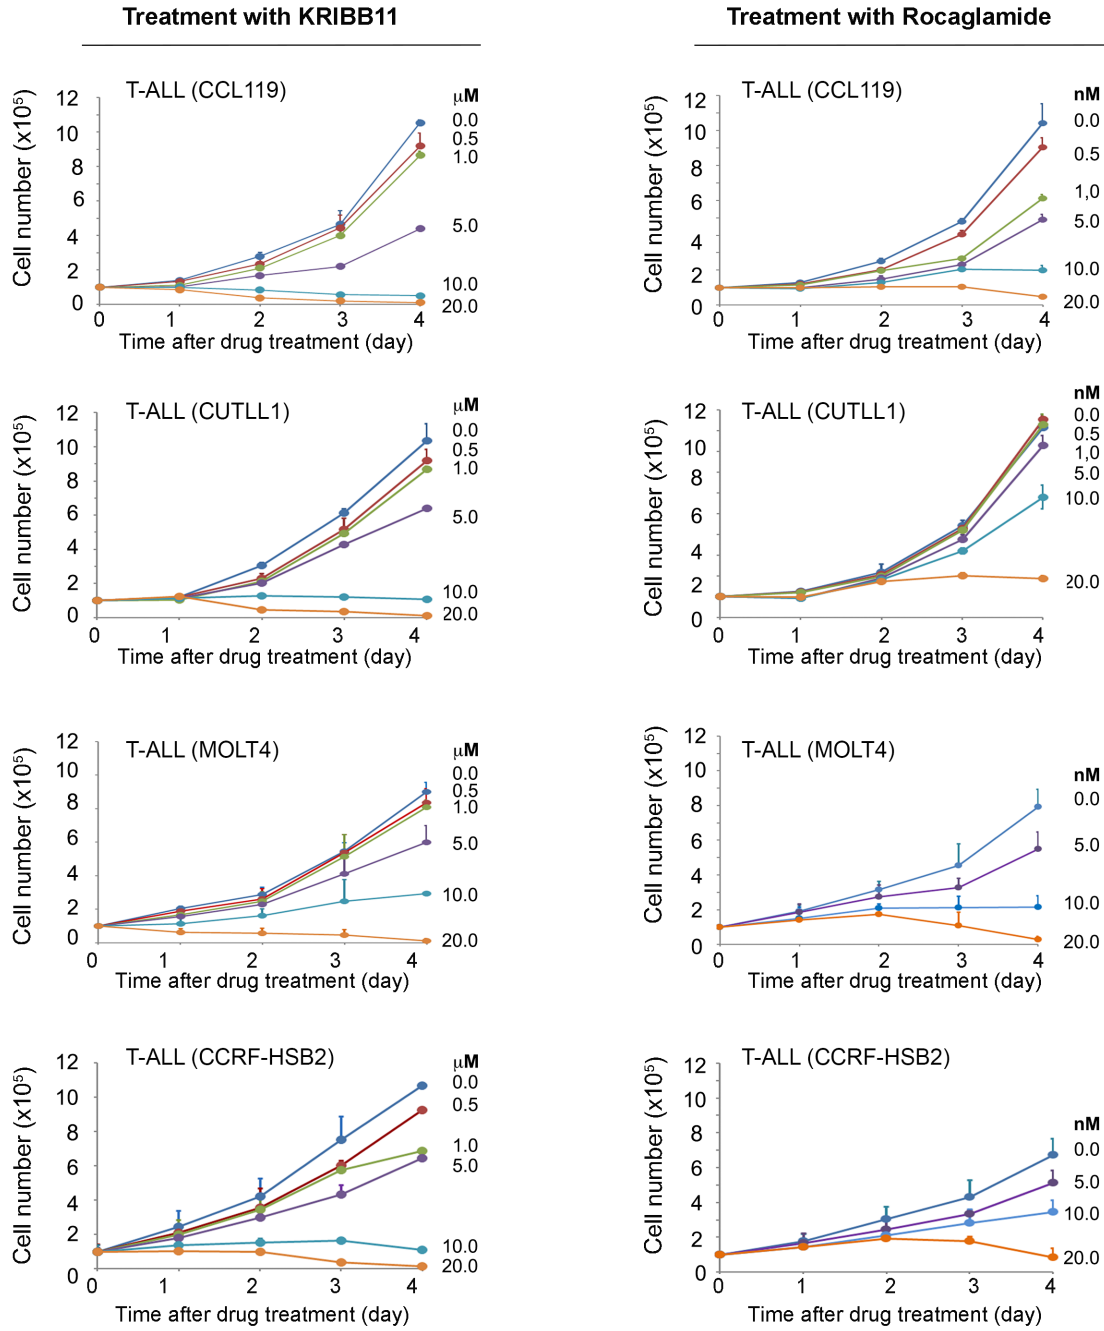

Fig. S2

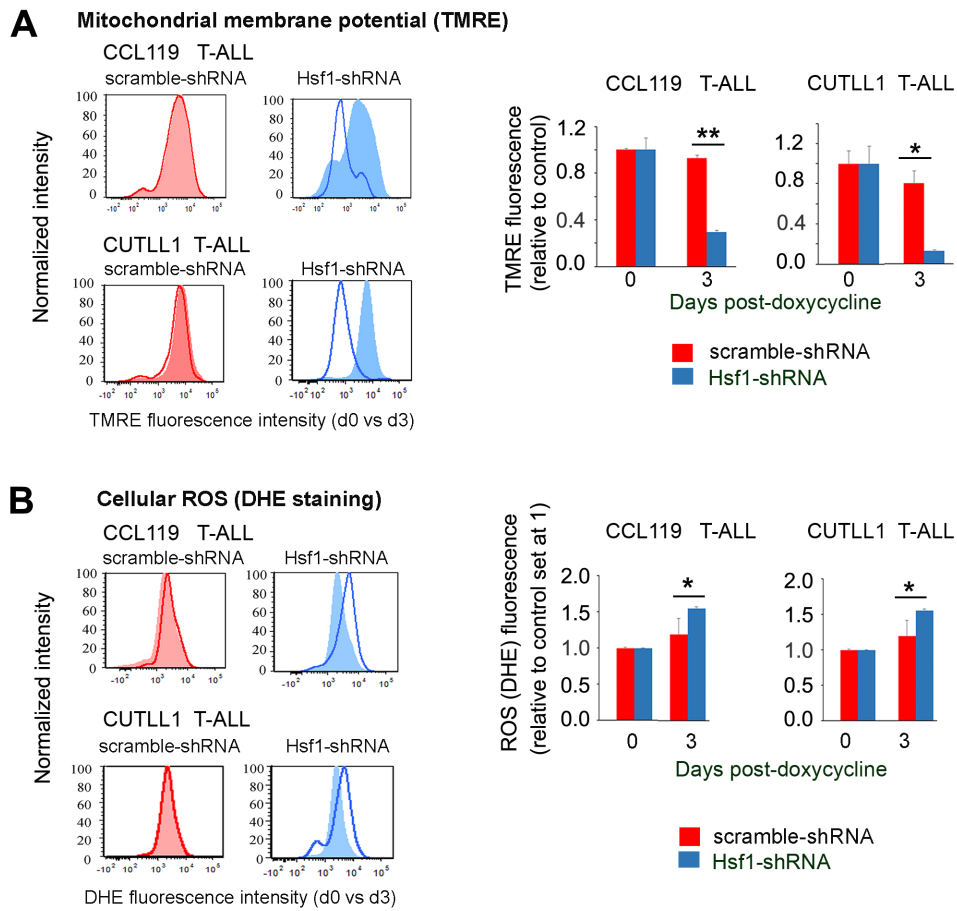

**Fig. S3 A-B**
